# Supplementary material for: Zeolitic imidazolate framework [Zn2(IM)4·(DMF)] for UV-white light-emitting diodes
Source: Royal Society of Chemistry journal article supplement (doi:10.1039/c2dt31269g), 2012-01-01
Supplement: c2dt31269g.pdf [file c2dt31269g.pdf]

## Supporting Information

# Zeolitic Imidazolate Framework $[\text{Zn}_2(\text{IM})_4 \cdot (\text{DMF})]$ for UV-white Light-emitting Diodes<sup>†</sup>

Chin-Chang Shen,<sup>a,b</sup> Wei-Ting Chen,<sup>a</sup> and Ru-Shi Liu<sup>\*,a</sup>

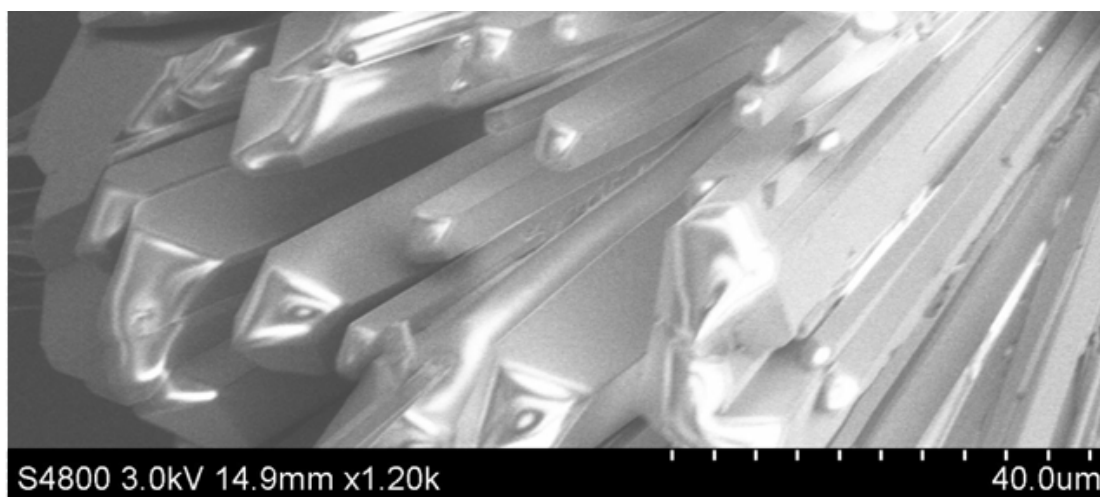

**Fig. S1** SEM image of  $[\text{Zn}_2(\text{IM})_4 \cdot (\text{DMF})]$ .

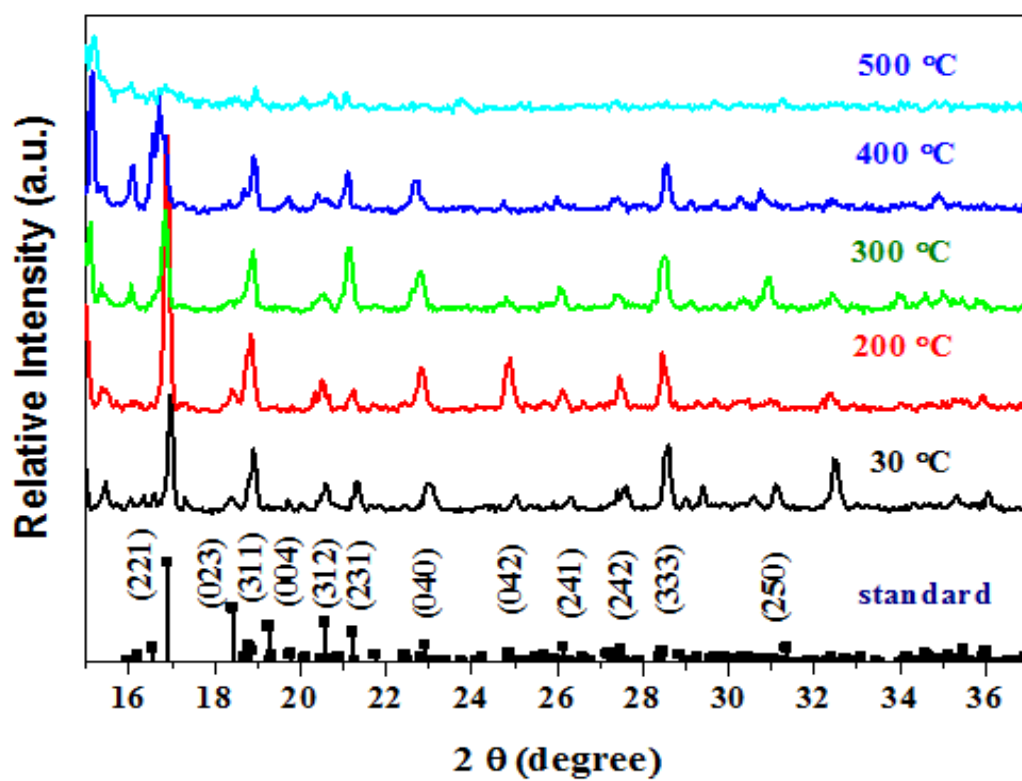

Fig. S2 *In situ* temperature-variant XRD patterns of  $[\text{Zn}_2(\text{IM})_4 \cdot (\text{DMF})]$ .

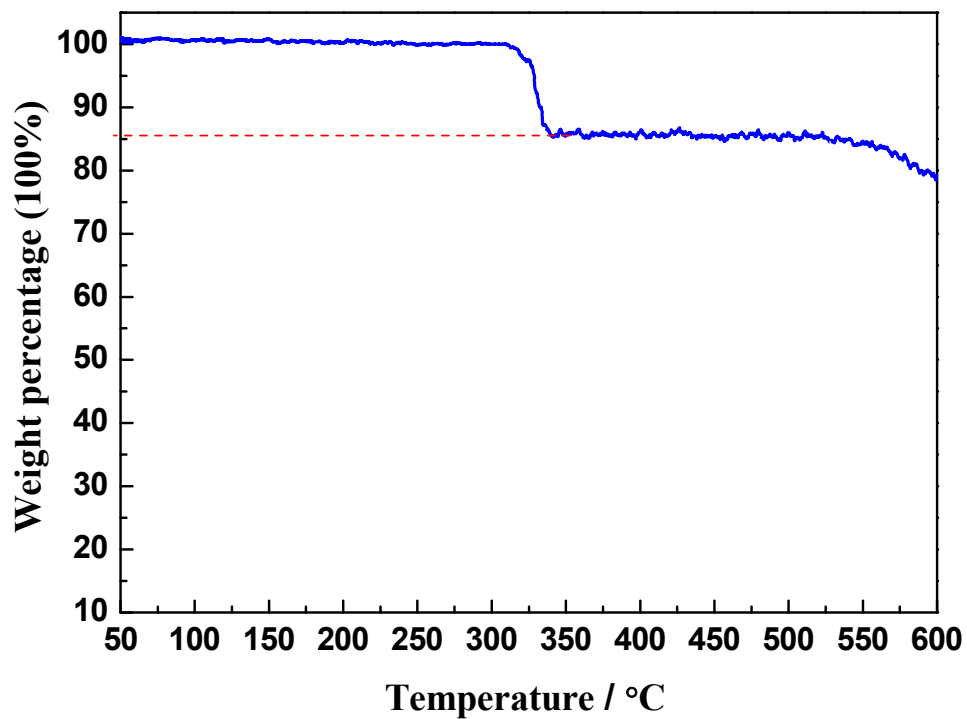

**Fig. S3** TGA curves of  $[\text{Zn}_2(\text{IM})_4 \cdot (\text{DMF})]$  in flowing  $\text{N}_2$  with heating at a rate of  $10 \text{ }^\circ\text{C min}^{-1}$ .

**Table S1** (a) Crystallographic Structure Data of  $[\text{Zn}_2(\text{IM})_4\cdot(\text{DMF})]$  at 295 K. (b) Atomic Coordinates. (c) Selected Interatomic Distances (Å) and angles ( $^\circ$ ) of  $[\text{Zn}_2(\text{IM})_4\cdot(\text{DMF})]$ .

(a)

| $\text{C}_{15}\text{H}_{19}\text{N}_9\text{OZn}_2$ | $[\text{Zn}_2(\text{IM})_4\cdot(\text{DMF})]$                                                                                                           |
|----------------------------------------------------|---------------------------------------------------------------------------------------------------------------------------------------------------------|
| Crystal system                                     | Orthorhombic                                                                                                                                            |
| Space group                                        | $Pbca(61)$                                                                                                                                              |
| Z                                                  | 8                                                                                                                                                       |
| Cell Parameters:                                   | $a = 15.4109(2) \text{ \AA}$ $\alpha = 90^\circ$<br>$b = 15.5132(2) \text{ \AA}$ $\beta = 90^\circ$<br>$c = 18.4120(2) \text{ \AA}$ $\gamma = 90^\circ$ |
| Cell volume:                                       | $4401.8(1) \text{ \AA}^3$                                                                                                                               |
| Reliability Factor:                                | GOF = 1.406 $R_p = 5.14\%$ $R_{wp} = 17.11\%$                                                                                                           |

(b)

| Atom | Wyck. | x         | y          | z          | Frac | Uiso(Å <sup>2</sup> ) |
|------|-------|-----------|------------|------------|------|-----------------------|
| Zn1  | 8c    | 0.20030   | 0.14090    | 0.0938     | 1.00 | 0.053(1)              |
| Zn2  | 8c    | 0.0082    | 0.1627     | -0.185     | 1.00 | 0.053(1)              |
| N(1) | 8c    | 0.1724(2) | 0.1244(3)  | -0.0095(2) | 1.00 | 0.059(1)              |
| N(2) | 8c    | 0.0997(2) | 0.1318(2)  | -0.1135(2) | 1.00 | 0.058(1)              |
| N(3) | 8c    | 0.1334(2) | 0.2400(2)  | 0.1349(2)  | 1.00 | 0.056(1)              |
| N(4) | 8c    | 0.0609(2) | 0.3131(2)  | 0.2196(2)  | 1.00 | 0.059(1)              |
| N(5) | 8c    | 0.1621(2) | 0.0389(2)  | 0.1514(2)  | 1.00 | 0.062(1)              |
| N(6) | 8c    | 0.0769(2) | -0.0663(2) | 0.1915(2)  | 1.00 | 0.060(1)              |
| N(7) | 8c    | 0.3255(2) | 0.1629(2)  | 0.1126(2)  | 1.00 | 0.059(1)              |
| N(8) | 8c    | 0.4418(2) | 0.2374(2)  | 0.1464(2)  | 1.00 | 0.057(1)              |

(c)

| [Zn <sub>2</sub> (IM) <sub>4</sub> ·(DMF)] |           |           |           |
|--------------------------------------------|-----------|-----------|-----------|
| <b>Distances/Å</b>                         |           |           |           |
| Zn1-N1                                     | 1.9667 x3 | Zn2-N2    | 1.9878 x3 |
| Zn1-N3                                     | 1.9998x3  | Zn2-N4    | 1.9713x3  |
| Zn1-N5                                     | 1.9938x3  | Zn2-N6    | 1.9927x3  |
| Zn1-N7                                     | 1.9897x3  | Zn2-N8    | 1.9885x3  |
| <b>Angles /°</b>                           |           |           |           |
| N1_Zn1_N3                                  | 110.689   | N2_Zn2_N4 | 110.108   |
| N1_Zn1_N5                                  | 105.278   | N2_Zn2_N6 | 109.006   |
| N1_Zn1_N7                                  | 113.739   | N2_Zn2_N8 | 108.439   |
| N3_Zn1_N5                                  | 104.870   | N4_Zn2_N6 | 111.135   |
| N3_Zn1_N7                                  | 107.592   | N4_Zn2_N8 | 112.462   |
| N5_Zn1_N7                                  | 109.264   | N6_Zn2_N8 | 105.527   |
